# Supplementary material for: Genome-Wide Characterization of Alternative Splicing Events and Their Responses to Cold Stress in Tilapia
Source: Front Genet. 2020 Mar 18;11:244. doi: 10.3389/fgene.2020.00244 (PMC7093569; doi:10.3389/fgene.2020.00244)
Supplement: Supplementary file 9 [file Table_9.XLSX]

## Sheet: sheet1
Additional file 9. GO categories shared by DAS and DEG genes in tilapia in response to cold stress
Tissue	Category	Term	Description	DAS	DEG
brain	GO Biological Processes	GO:0000375	RNA splicing, via transesterification reactions	ddx46,rbm5,rbm25b,srsf1a,srsf5b,sf3b1,txnl4a,snrpd2,mbnl2,dhx8,cirbpb	rbmx,ddx46,prpf6,rbm5,prpf4,rbm25b,celf2,smu1a,prpf31,lsm4,sfswap,tra2b,snrpb,srsf1a,rbfox2,rbfox1l,sf3b5,sart1,syf2,srek1,sf3b1,srsf6b,rbm8a,wbp4,nova1,ddx20,rbm4.2,rnpc3,srpk3,dhx40,cirbpb,luc7l3,trnau1apb,dhx37,rbfox3a,srrt,cpsf3,supt6h,cmtr1,ncbp3,tnpo3,hnrnpl,casc3,slbp,wdr33,tut1,alkbh5,rbm26,rrp1,rtca,ftsj3,gnl3,sephs1,heatr1,wdr75,ngdn,fbl,trnt1,trub2,polr3k,mphosph6,rcl1,trmt44,trpt1,trm…
brain	GO Biological Processes	GO:0000377	RNA splicing, via transesterification reactions with bulged adenosine as nucleophile	ddx46,rbm5,rbm25b,srsf1a,srsf5b,sf3b1,txnl4a,snrpd2,mbnl2,dhx8,cirbpb	rbmx,ddx46,prpf6,rbm5,prpf4,rbm25b,celf2,smu1a,prpf31,lsm4,sfswap,tra2b,snrpb,srsf1a,rbfox2,rbfox1l,sf3b5,sart1,syf2,srek1,sf3b1,srsf6b,rbm8a,wbp4,nova1,ddx20,rbm4.2,rnpc3,srpk3,dhx40,cirbpb,luc7l3,trnau1apb,dhx37,rbfox3a
brain	GO Biological Processes	GO:0000398	mRNA splicing, via spliceosome	ddx46,rbm5,rbm25b,srsf1a,srsf5b,sf3b1,txnl4a,snrpd2,mbnl2,dhx8,cirbpb	rbmx,ddx46,prpf6,rbm5,prpf4,rbm25b,celf2,smu1a,prpf31,lsm4,sfswap,tra2b,snrpb,srsf1a,rbfox2,rbfox1l,sf3b5,sart1,syf2,srek1,sf3b1,srsf6b,rbm8a,wbp4,nova1,ddx20,rbm4.2,rnpc3,srpk3,dhx40,cirbpb,luc7l3,trnau1apb,dhx37,rbfox3a
brain	GO Biological Processes	GO:0006396	RNA processing	qkia,nop2,ddx46,rbm5,rbm25b,wdr75,utp6,hnrpkl,srsf1a,sltm,srrm1,srsf5b,tyw3,dus4l,sf3b1,wdr33,txnl4a,snrpd2,srek1ip1,mbnl2,ptbp2b,dhx8,dkc1,cirbpb	srrt,rrp1,rtca,ftsj3,rbmx,gnl3,ddx46,prpf6,rbm5,cpsf3,sephs1,prpf4,rbm25b,heatr1,supt6h,wdr75,celf2,ngdn,cmtr1,ncbp3,smu1a,prpf31,lsm4,tnpo3,hnrnpl,sfswap,tra2b,snrpb,casc3,fbl,srsf1a,rbfox2,rbfox1l,slbp,trnt1,trub2,sf3b5,polr3k,sart1,syf2,srek1,mphosph6,rcl1,sf3b1,wdr33,trmt44,srsf6b,trpt1,rbm8a,trmt13,osgep,rpp14,wbp4,ints8,nova1,ddx20,alkbh8,nob1,rbm4.2,grsf1,dgcr8,tut1,ints4,exosc3,rnpc3,srpk…
brain	GO Biological Processes	GO:0006397	mRNA processing	qkia,ddx46,rbm5,rbm25b,srsf1a,sltm,srrm1,srsf5b,sf3b1,wdr33,txnl4a,snrpd2,srek1ip1,mbnl2,ptbp2b,dhx8,cirbpb,ddx5,hnrpkl,puf60a,nop2,wdr75,utp6,tyw3,dus4l,dkc1,nup54,nup210,eif4bb,eif4a2	srrt,rbmx,ddx46,prpf6,rbm5,cpsf3,prpf4,rbm25b,supt6h,celf2,cmtr1,ncbp3,smu1a,prpf31,lsm4,tnpo3,hnrnpl,sfswap,tra2b,snrpb,casc3,srsf1a,rbfox2,rbfox1l,slbp,sf3b5,sart1,syf2,srek1,sf3b1,wdr33,srsf6b,rbm8a,wbp4,nova1,ddx20,rbm4.2,tut1,rnpc3,srpk3,alkbh5,dhx40,rbm26,cirbpb,luc7l3,trnau1apb,dhx37,rbfox3a
brain	GO Biological Processes	GO:0006397	mRNA processing	qkia,ddx46,rbm5,rbm25b,srsf1a,sltm,srrm1,srsf5b,sf3b1,wdr33,txnl4a,snrpd2,srek1ip1,mbnl2,ptbp2b,dhx8,cirbpb	srrt,rbmx,ddx46,prpf6,rbm5,cpsf3,prpf4,rbm25b,supt6h,celf2,cmtr1,ncbp3,smu1a,prpf31,lsm4,tnpo3,hnrnpl,sfswap,tra2b,snrpb,casc3,srsf1a,rbfox2,rbfox1l,slbp,sf3b5,sart1,syf2,srek1,sf3b1,wdr33,srsf6b,rbm8a,wbp4,nova1,ddx20,rbm4.2,tut1,rnpc3,srpk3,alkbh5,dhx40,rbm26,cirbpb,luc7l3,trnau1apb,dhx37,rbfox3a
brain	GO Biological Processes	GO:0008380	RNA splicing	qkia,ddx46,rbm5,rbm25b,srsf1a,srsf5b,sf3b1,txnl4a,snrpd2,srek1ip1,mbnl2,dhx8,cirbpb	rbmx,ddx46,prpf6,rbm5,prpf4,rbm25b,celf2,smu1a,prpf31,lsm4,tnpo3,sfswap,tra2b,snrpb,casc3,srsf1a,rbfox2,rbfox1l,sf3b5,sart1,syf2,srek1,sf3b1,srsf6b,trpt1,rbm8a,wbp4,nova1,ddx20,rbm4.2,rnpc3,srpk3,dhx40,cirbpb,luc7l3,tsen2,trnau1apb,dhx37,rbfox3a
brain	GO Biological Processes	GO:0009648	photoperiodism	per3,per2,per1a	clocka,arntl2,per3,per2,fbxl3b,per1a
brain	GO Biological Processes	GO:0016071	mRNA metabolic process	qkia,ddx46,rbm5,rbm25b,srsf1a,sltm,srrm1,srsf5b,sf3b1,wdr33,txnl4a,snrpd2,srek1ip1,mbnl2,ptbp2b,dhx8,dkc1,cirbpb	srrt,rbmx,ddx46,prpf6,rbm5,cpsf3,tardbp,prpf4,rbm25b,supt6h,celf2,cmtr1,ncbp3,smu1a,prpf31,lsm4,tnpo3,hnrnpl,sfswap,tra2b,snrpb,casc3,srsf1a,rbfox2,rbfox1l,slbp,sf3b5,sart1,syf2,srek1,sf3b1,wdr33,srsf6b,rbm8a,edc3,wbp4,nova1,ddx20,rbm4.2,a1cf,tut1,exosc3,edc4,rnpc3,dis3l2,srpk3,alkbh5,dhx40,ago2,dkc1,rbm26,cirbpb,luc7l3,trnau1apb,dhx37,patl1,smg6,rbfox3a
brain	GO Biological Processes	GO:0032922	circadian regulation of gene expression	per3,per2,per1a	clocka,per3,per2,bhlhe40,nfil3-5,nr1d2a,nr1d1,per1a
brain	GO Biological Processes	GO:0042752	regulation of circadian rhythm	per3,per2,scn1lab,per1a	per3,per2,csnk1db,fbxl3b,nr1d1,pitpnc1a,per1a,nr1d4b,pspc1,cipcb,clocka,bhlhe40,nfil3-5,nr1d2a,arntl2,id3,id4,mtnr1al,lgr4
brain	GO Biological Processes	GO:0043153	entrainment of circadian clock by photoperiod	per3,per2,per1a,scn1lab,hnrpkl,srsf1a,srsf5b,usp7,eef1db,mapk10,ppp1cc	per3,per2,fbxl3b,per1a
brain	GO Biological Processes	GO:0043153	entrainment of circadian clock by photoperiod	per3,per2,per1a	per3,per2,fbxl3b,per1a
brain	GO Biological Processes	GO:0048024	regulation of mRNA splicing, via spliceosome	rbm5,rbm25b,srsf1a,srsf5b,mbnl2,cirbpb	rbmx,rbm5,rbm25b,celf2,smu1a,tra2b,srsf1a,rbfox2,rbfox1l,srek1,srsf6b,rbm8a,rbm4.2,cirbpb,dhx37,rbfox3a
brain	GO Biological Processes	GO:0048667	cell morphogenesis involved in neuron differentiation	ncam1a,efna3b,appb,alcamb,grnb,nptna,ttc26,lhx9,dpysl3,si:dkey-16p21.7,tppp2,nedd4l,kif5c,trip4,nfasca,zswim5,atp6ap1b,capzb,cdc42,fgfr2,cntn1a,vdac3,b3gat1a,ttc8,stmn1a,sept15,flr,ewsr1a,atp2b1a,skor1b	tenm4,ptch2,alcama,en1a,ephb3a,notch1a,elavl4,scn8aa,fezf2,epha4a,efna3b,vangl2,alcamb,tardbp,optn,gli1,kctd12.1,apc,unk,capn1a,fus,pik3cd,spast,nrp2a,sqstm1,sfpq,fam53b,slbp,pls3,olfm1a,cobl,ascc1,lhx9,dpysl2b,sema5ba,si:dkey-16p21.7,cdkl5,tppp2,pnpla6,pik3ca,ephb2a,sipa1l1,hecw1b,sema4ga,prmt8b,exosc3,kif5c,sema3e,shank3b,plxna3,dscama,rgs4,lama1,sema4ab,nexn,disp1,draxin,spg11,coro1a,epha6,nfa…
brain	GO Biological Processes	GO:0048667	cell morphogenesis involved in neuron differentiation	ncam1a,efna3b,appb,alcamb,grnb,nptna,ttc26,lhx9,dpysl3,si:dkey-16p21.7,tppp2,nedd4l,kif5c,trip4,nfasca,zswim5	tenm4,ptch2,alcama,en1a,ephb3a,notch1a,elavl4,scn8aa,fezf2,epha4a,efna3b,vangl2,alcamb,tardbp,optn,gli1,kctd12.1,apc,unk,capn1a,fus,pik3cd,spast,nrp2a,sqstm1,sfpq,fam53b,slbp,pls3,olfm1a,cobl,ascc1,lhx9,dpysl2b,sema5ba,si:dkey-16p21.7,cdkl5,tppp2,pnpla6,pik3ca,ephb2a,sipa1l1,hecw1b,sema4ga,prmt8b,exosc3,kif5c,sema3e,shank3b,plxna3,dscama,rgs4,lama1,sema4ab,nexn,disp1,draxin,spg11,coro1a,epha6,nfa…
brain	GO Biological Processes	GO:0050684	regulation of mRNA processing	rbm5,rbm25b,srsf1a,sltm,srsf5b,mbnl2,cirbpb	rbmx,rbm5,rbm25b,supt6h,celf2,smu1a,tra2b,srsf1a,rbfox2,rbfox1l,srek1,srsf6b,rbm8a,rbm4.2,srpk3,cirbpb,dhx37,rbfox3a
brain	GO Biological Processes	GO:0061564	axon development	ncam1a,efna3b,appb,alcamb,grnb,nptna,b3gat1a,lhx9,dpysl3,si:dkey-16p21.7,tppp2,kif5c,trip4,nfasca,zswim5	tenm4,ptch2,alcama,en1a,ephb3a,notch1a,elavl4,scn8aa,fezf2,epha4a,efna3b,vangl2,hmgb1a,alcamb,tardbp,cnp,optn,gli1,cntfr,apc,erbb2,capn1a,fus,pik3cd,spast,nrp2a,sqstm1,sfpq,fam53b,slbp,pls3,olfm1a,erbb3b,ascc1,lhx9,dpysl2b,sema5ba,si:dkey-16p21.7,cdkl5,tppp2,pnpla6,pik3ca,ephb2a,sema4ga,exosc3,kif5c,sema3e,plxna3,dscama,rgs4,lama1,sema4ab,nexn,disp1,draxin,spg11,coro1a,epha6,nfasca,amigo1,adcy8,z…
brain	GO Biological Processes	GO:0120036	plasma membrane bounded cell projection organization	ncam1a,efna3b,appb,atp6ap1b,alcamb,capzb,grnb,cdc42,fgfr2,cntn1a,nptna,vdac3,ttc26,b3gat1a,lhx9,dpysl3,si:dkey-16p21.7,tppp2,nedd4l,kif5c,trip4,ttc8,stmn1a,sept15,flr,nfasca,zswim5	tenm4,ptch2,alcama,en1a,ephb3a,notch1a,elavl4,scn8aa,fezf2,epha4a,efna3b,vangl2,myo7aa,bbs2,cad,hmgb1a,ift88,alcamb,tnika,tardbp,cnp,rpe,optn,cdc42,tsc1a,gli1,plk4,cntfr,abcc4,kctd12.1,apc,erbb2,cdc14b,capn1a,nudc,fus,pik3cd,spast,nrp2a,sqstm1,csnk1db,sfpq,fam53b,fmnl3,slbp,cdc42ep4a,pls3,olfm1a,fam92a1,cplane2,impact,ttc36,iqcb1,cobl,rfx2,erbb3b,ascc1,lhx9,stmn1b,fto,dpysl2b,sema5ba,grip1,si:dke…
heart	GO Biological Processes	GO:0055001	muscle cell development	qkia,mef2aa,tnnt2a,ttn.2,mat2aa,fxr1,myom2a,rbfox1l,csrp3,slc8a1a,mybpc3,pgm5,smyd1b,grk3,nexn,myom1b,tmod1,myh7ba,tnni3k,itga7,cdc42,phactr4b,mical3a,gna12a,add3a,xirp2a,actn1,ablim2,sorbs2a,cdc42l,ncam1a,appb,sema3ga,phip,rilpl1,map4k4,rplp0,rpl23a,vdac3,atxn2,slmapb	desma,qkia,mef2aa,hsp90aa1.1,unc45b,dag1,smyd1a,mybpha,chrnd,lgals2a,tpm4a,rbfox2,rbfox1l,acta1b,adssl1,cav3,mybpc1,lrrc39,tcap,hmcn2,myo18aa,akap12b,nexn,obsl1a,plod2
heart	GO Biological Processes	GO:0007507	heart development	mef2aa,tnnt2a,ttn.2,mat2aa,fxr1,myom2a,rbfox1l,gna12a,mybpc3,xirp2a,smyd1b,grk3,nexn,myom1b	meis2b,tbx5a,vdra,hhex,cx43,cdh2,jupa,gata2a,mef2aa,notch1a,hey1,hey2,dhfr,klf2a,cacna1c,fabp3,mpp5a,unc45b,nppa,atp6v0d1,fntb,rpa1,prss23,mib1,smarca4a,prickle1a,pdgfra,mybpha,atp2a2a,tmem88a,tpm4a,rbfox2,rbfox1l,acta1b,ccm2,sgcg,mybpc1,ttc36,apobec2a,lrrc39,bnip3lb,npr1a,hmcn2,syne1b,spns2,ccm2l,bbs1,plekha7a,nexn,mmd,ncl,kdrl,obsl1a,ptpn21,rtf1,tmem65,fn1a,nrg2a,foxc1a,nppb,aldh1l1,clocka,foxo…
heart	GO Biological Processes	GO:0007517	muscle organ development	qkia,tnnt2a,ttn.2,fxr1,myom2a,rbfox1l,mybpc3,tnni3k,itga7,myom1b	desma,qkia,hsp90aa1.1,mpp5a,unc45b,dag1,mibp2,mybpha,tmem88a,lgals2a,rbfox2,rbfox1l,acta1b,adssl1,mybpc1,apobec2a,lrrc39,tcf21,hmcn2,myo18aa,col6a1,col15a1a,obsl1a,nrg2a,plod2,cdkn1a
heart	GO Biological Processes	GO:0007519	skeletal muscle tissue development	qkia,ttn.2,fxr1,rbfox1l,tnni3k,itga7,rbm5,zfp36l2,srpk3	desma,qkia,unc45b,dag1,lgals2a,rbfox2,rbfox1l,acta1b,adssl1,mybpc1,tcf21,myo18aa,col6a1,col15a1a,plod2,cdkn1a
heart	GO Biological Processes	GO:0007519	skeletal muscle tissue development	qkia,ttn.2,fxr1,rbfox1l,tnni3k,itga7	desma,qkia,unc45b,dag1,lgals2a,rbfox2,rbfox1l,acta1b,adssl1,mybpc1,tcf21,myo18aa,col6a1,col15a1a,plod2,cdkn1a
heart	GO Biological Processes	GO:0009648	photoperiodism	per3,per2,per1a	clocka,arntl2,per3,per2,npas2
heart	GO Biological Processes	GO:0010927	cellular component assembly involved in morphogenesis	qkia,mef2aa,tnnt2a,ttn.2,myom2a,csrp3,slc8a1a,mybpc3,pgm5,smyd1b,myom1b,tmod1	desma,qkia,mef2aa,hsp90aa1.1,unc45b,smyd1a,mybpha,chrnd,tpm4a,cav3,mybpc1,lrrc39,hmcn2,myo18aa,obsl1a
heart	GO Biological Processes	GO:0014706	striated muscle tissue development	qkia,tnnt2a,ttn.2,mat2aa,fxr1,myom2a,rbfox1l,mybpc3,pgm5,smyd1b,nexn,tnni3k,itga7,myom1b	tbx5a,desma,qkia,cacna1c,mpp5a,unc45b,dag1,nppa,smarca4a,mybpha,tmem88a,lgals2a,tpm4a,rbfox2,rbfox1l,acta1b,adssl1,sgcg,mybpc1,lrrc39,tcf21,npr1a,hmcn2,myo18aa,col6a1,plekha7a,nexn,col15a1a,obsl1a,nrg2a,plod2,cdkn1a,nppb,mef2aa,hsp90aa1.1,smyd1a,chrnd,cav3,dock5,pgam2,mibp2,apobec2a,tcap,akap12b,homer1b,cdh2,klf2a,fn1a,kif23,epb41b,arhgef10,anln
heart	GO Biological Processes	GO:0014866	skeletal myofibril assembly	qkia,ttn.2,myom2a,mybpc3,smyd1b,myom1b	qkia,hsp90aa1.1,smyd1a,mybpha,mybpc1,hmcn2,myo18aa,obsl1a
heart	GO Biological Processes	GO:0030239	myofibril assembly	qkia,mef2aa,tnnt2a,ttn.2,myom2a,csrp3,slc8a1a,mybpc3,pgm5,smyd1b,myom1b,tmod1	desma,qkia,mef2aa,hsp90aa1.1,unc45b,smyd1a,mybpha,chrnd,tpm4a,cav3,mybpc1,lrrc39,hmcn2,myo18aa,obsl1a
heart	GO Biological Processes	GO:0030240	skeletal muscle thin filament assembly	ttn.2,myom2a,mybpc3,smyd1b,myom1b	hsp90aa1.1,smyd1a,mybpha,mybpc1,hmcn2,obsl1a
heart	GO Biological Processes	GO:0030241	skeletal muscle myosin thick filament assembly	ttn.2,myom2a,mybpc3,smyd1b,myom1b	hsp90aa1.1,smyd1a,mybpha,mybpc1,hmcn2,obsl1a
heart	GO Biological Processes	GO:0031032	actomyosin structure organization	qkia,mef2aa,tnnt2a,ttn.2,myom2a,csrp3,gna12a,slc8a1a,mybpc3,pgm5,smyd1b,myom1b,tmod1	desma,qkia,mef2aa,hsp90aa1.1,kif23,unc45b,smyd1a,epb41b,arhgef10,mybpha,chrnd,tpm4a,cav3,mybpc1,lrrc39,anln,hmcn2,myo18aa,obsl1a
heart	GO Biological Processes	GO:0031033	myosin filament organization	ttn.2,myom2a,mybpc3,smyd1b,myom1b	hsp90aa1.1,smyd1a,mybpha,mybpc1,hmcn2,obsl1a
heart	GO Biological Processes	GO:0031034	myosin filament assembly	ttn.2,myom2a,mybpc3,smyd1b,myom1b	hsp90aa1.1,smyd1a,mybpha,mybpc1,hmcn2,obsl1a
heart	GO Biological Processes	GO:0032922	circadian regulation of gene expression	per3,per2,per1a	clocka,per3,per2,bhlhe40,nfil3-5,nfil3-6,nr1d1,nampta
heart	GO Biological Processes	GO:0035051	cardiocyte differentiation	ttn.2,mat2aa,myom2a,rbfox1l,mybpc3,smyd1b,nexn,myom1b	tbx5a,cdh2,klf2a,mybpha,tmem88a,tpm4a,rbfox2,rbfox1l,mybpc1,hmcn2,plekha7a,nexn,obsl1a,fn1a
heart	GO Biological Processes	GO:0042692	muscle cell differentiation	qkia,mef2aa,tnnt2a,ttn.2,mat2aa,fxr1,myom2a,rbfox1l,csrp3,slc8a1a,mybpc3,pgm5,smyd1b,grk3,nexn,myom1b,tmod1,myh7ba	tbx5a,desma,qkia,mef2aa,hsp90aa1.1,unc45b,dag1,smyd1a,mybpha,tmem88a,chrnd,lgals2a,tpm4a,rbfox2,rbfox1l,acta1b,adssl1,cav3,mybpc1,lrrc39,tcap,hmcn2,myo18aa,akap12b,plekha7a,dock5,pgam2,nexn,obsl1a,plod2
heart	GO Biological Processes	GO:0042752	regulation of circadian rhythm	per3,per2,per1a	per3,per2,siah2l,csnk1db,nr1d1,nr1d4b
heart	GO Biological Processes	GO:0048738	cardiac muscle tissue development	tnnt2a,ttn.2,mat2aa,myom2a,rbfox1l,mybpc3,smyd1b,nexn,myom1b	tbx5a,cacna1c,mpp5a,unc45b,nppa,smarca4a,mybpha,tmem88a,tpm4a,rbfox2,rbfox1l,sgcg,mybpc1,lrrc39,npr1a,hmcn2,plekha7a,nexn,obsl1a,nrg2a,nppb
heart	GO Biological Processes	GO:0048739	cardiac muscle fiber development	ttn.2,myom2a,rbfox1l,mybpc3,nexn,myom1b	mybpha,rbfox2,rbfox1l,mybpc1,hmcn2,nexn,obsl1a
heart	GO Biological Processes	GO:0048747	muscle fiber development	ttn.2,fxr1,myom2a,rbfox1l,mybpc3,nexn,myom1b	unc45b,dag1,mybpha,lgals2a,rbfox2,rbfox1l,acta1b,adssl1,mybpc1,hmcn2,myo18aa,nexn,obsl1a,plod2
heart	GO Biological Processes	GO:0051146	striated muscle cell differentiation	qkia,mef2aa,tnnt2a,ttn.2,mat2aa,fxr1,myom2a,rbfox1l,csrp3,slc8a1a,mybpc3,pgm5,smyd1b,nexn,myom1b,tmod1	tbx5a,desma,qkia,mef2aa,hsp90aa1.1,unc45b,dag1,smyd1a,mybpha,tmem88a,chrnd,lgals2a,tpm4a,rbfox2,rbfox1l,acta1b,adssl1,cav3,mybpc1,lrrc39,hmcn2,myo18aa,plekha7a,dock5,pgam2,nexn,obsl1a,plod2
heart	GO Biological Processes	GO:0055001	muscle cell development	qkia,mef2aa,tnnt2a,ttn.2,mat2aa,fxr1,myom2a,rbfox1l,csrp3,slc8a1a,mybpc3,pgm5,smyd1b,grk3,nexn,myom1b,tmod1,myh7ba	desma,qkia,mef2aa,hsp90aa1.1,unc45b,dag1,smyd1a,mybpha,chrnd,lgals2a,tpm4a,rbfox2,rbfox1l,acta1b,adssl1,cav3,mybpc1,lrrc39,tcap,hmcn2,myo18aa,akap12b,nexn,obsl1a,plod2
heart	GO Biological Processes	GO:0055002	striated muscle cell development	qkia,mef2aa,tnnt2a,ttn.2,mat2aa,fxr1,myom2a,rbfox1l,csrp3,slc8a1a,mybpc3,pgm5,smyd1b,nexn,myom1b,tmod1	desma,qkia,mef2aa,hsp90aa1.1,unc45b,dag1,smyd1a,mybpha,chrnd,lgals2a,tpm4a,rbfox2,rbfox1l,acta1b,adssl1,cav3,mybpc1,lrrc39,hmcn2,myo18aa,nexn,obsl1a,plod2
heart	GO Biological Processes	GO:0055007	cardiac muscle cell differentiation	ttn.2,mat2aa,myom2a,rbfox1l,mybpc3,smyd1b,nexn,myom1b	tbx5a,mybpha,tmem88a,tpm4a,rbfox2,rbfox1l,mybpc1,hmcn2,plekha7a,nexn,obsl1a
heart	GO Biological Processes	GO:0055008	cardiac muscle tissue morphogenesis	tnnt2a,ttn.2,myom2a,mybpc3,myom1b	mpp5a,mybpha,mybpc1,lrrc39,hmcn2,obsl1a,nrg2a
heart	GO Biological Processes	GO:0060537	muscle tissue development	qkia,tnnt2a,ttn.2,mat2aa,fxr1,myom2a,rbfox1l,mybpc3,pgm5,smyd1b,nexn,tnni3k,itga7,myom1b	tbx5a,desma,qkia,cacna1c,mpp5a,unc45b,dag1,nppa,smarca4a,mybpha,tmem88a,lgals2a,tpm4a,rbfox2,rbfox1l,acta1b,adssl1,sgcg,mybpc1,lrrc39,tcf21,npr1a,hmcn2,myo18aa,col6a1,plekha7a,nexn,col15a1a,obsl1a,nrg2a,plod2,cdkn1a,nppb
heart	GO Biological Processes	GO:0060538	skeletal muscle organ development	qkia,ttn.2,fxr1,rbfox1l,tnni3k,itga7	desma,qkia,unc45b,dag1,lgals2a,rbfox2,rbfox1l,acta1b,adssl1,mybpc1,apobec2a,tcf21,myo18aa,col6a1,col15a1a,plod2,cdkn1a
heart	GO Biological Processes	GO:0061061	muscle structure development	qkia,mef2aa,tnnt2a,ttn.2,mat2aa,fxr1,myom2a,rbfox1l,csrp3,slc8a1a,mybpc3,pgm5,smyd1b,grk3,nexn,tnni3k,itga7,myom1b,tmod1,myh7ba	tbx5a,desma,qkia,mef2aa,hsp90aa1.1,mpp5a,unc45b,dag1,smyd1a,mibp2,mybpha,tmem88a,chrnd,lgals2a,tpm4a,rbfox2,rbfox1l,acta1b,adssl1,homer1b,cav3,mybpc1,apobec2a,lrrc39,tcap,tcf21,hmcn2,myo18aa,akap12b,col6a1,plekha7a,dock5,pgam2,nexn,col15a1a,obsl1a,nrg2a,plod2,cdkn1a
heart	GO Biological Processes	GO:0071688	striated muscle myosin thick filament assembly	ttn.2,myom2a,mybpc3,smyd1b,myom1b	hsp90aa1.1,smyd1a,mybpha,mybpc1,hmcn2,obsl1a
heart	GO Biological Processes	GO:1903311	regulation of mRNA metabolic process	qkia,rbm5,fxr1,zfp36l2,rbfox1l,srpk3	qkia,rbm5,tent5c,rbm25b,celf2,srsf1a,rbfox2,rbfox1l,srsf5b,srek1,srsf6b,rbm8a,rbm4.2,dazap1,cirbpb,ncl,tnrc6c2,srpk2
